# Supplementary material
Source: PubMed Central journal article supplement (PMC2799548)
Supplement: NIHMS158734-supplement-01.pdf [file NIHMS158734-supplement-01.pdf]

11. Asahina K, Fujimori H, Shimizu-Saito K, Kumashiro Y, Okamura K, Tanaka Y, et al. Expression of the liver-specific gene *Cyp7a1* reveals hepatic differentiation in embryoid bodies derived from mouse embryonic stem cells. *Genes Cells*. 2004;9:1297-1308.

12. Gadue P, Gouon-Evans V, Cheng X, Wandzioch E, Zaret KS, Grompe M, et al. The Generation of Monoclonal Antibodies Specific for Cell Surface Molecules Expressed on Early Mouse Endoderm. *Stem Cells* 2009 (EPub).

### Supplementary Table

| <b>Gene*</b>                    | <b>Forward Sequence</b>     | <b>Reverse Sequence</b>   |
|---------------------------------|-----------------------------|---------------------------|
| <i>AFP</i>                      | AGAACCTGTCACAAGCTGTG        | GACAGCAAGCTGAGGATGTC      |
| <i>HNF4<math>\alpha</math></i>  | CTGCTCGGAGCCACCAAGAGATCCATG | ATCATCTGCCACGTGATGCTCTGCA |
| <i>OCT4</i>                     | GACAACAATGAAAATCTTCAGGAGA   | TTCTGGCGCCGGTTACAGAACCA   |
| <i>CYP7A1</i>                   | CTGCCAATCCTCTTGAGTTCC       | ACTCGGTAGCAGAAAGAATACATC  |
| <i>NANOG</i>                    | TGAACCTCAGCTACAAACAG        | TGGTGGTAGGAAGAGTAAAG      |
| <i>SOX2</i>                     | AGCTACAGCATGATGCAGGA        | GGTCATGGAGTTGTACTGCA      |
| <i>hTERT</i>                    | TGTGCACCAACATCTACAAG        | GCGTTCTTGGCTTTCAGGAT      |
| <i><math>\beta</math>-ACTIN</i> | TGAAGTGTGACGTGGACATC        | GGAGGAGCAATGATCTTGAT      |

**Table 1. Primer sequences and RT- PCR conditions.**

\**AFP* – alpha-fetoprotein ; *HNF4 $\alpha$*  – hepatocyte nuclear factor 4 alpha ; *OCT4* – Octamer 3/4 ; *CYP7A1* – cytochrome p450 7A1; *NANOG* – NANOG; *SOX2*- sex determining region Y related HMG box; *hTERT*- catalytic subunit of human telomerase;  *$\beta$ -ACTIN* – beta-actin.
